# Supplementary material for: A green and facile modification of red mud waste with MIL-100 (Fe) for multi-pollutant adsorption from wastewater: isotherms, kinetics, and thermodynamics
Source: Royal Society of Chemistry journal article supplement (doi:10.1039/d6ra00635c), 2026-04-07
Supplement: d6ra00635c1.pdf [file d6ra00635c1.pdf]

## Supplementary Information

for

### **A green and facile modification of red mud waste with MIL-100 (Fe) for multi-pollutant adsorption from wastewater: Isotherms, kinetics, and thermodynamics**

Adarsh Singh <sup>a</sup>, Manne Chimyang <sup>a</sup>, Akash Rawat <sup>b</sup>, Venkatesh Uddameri <sup>c</sup>, Ashok Kumar Gupta <sup>a\*</sup>

<sup>a</sup> Environmental Engineering Division, Department of Civil Engineering, Indian Institute of Technology Kharagpur, Kharagpur 721302, India

<sup>b</sup> School of Environmental Science and Engineering, Indian Institute of Technology Kharagpur, Kharagpur 721302, India

<sup>c</sup> Department of Civil and Environmental Engineering, Lamar University, Beaumont, TX 77701, USA

\*Corresponding author.

agupta@civil.iitkgp.ac.in (A.K. Gupta)

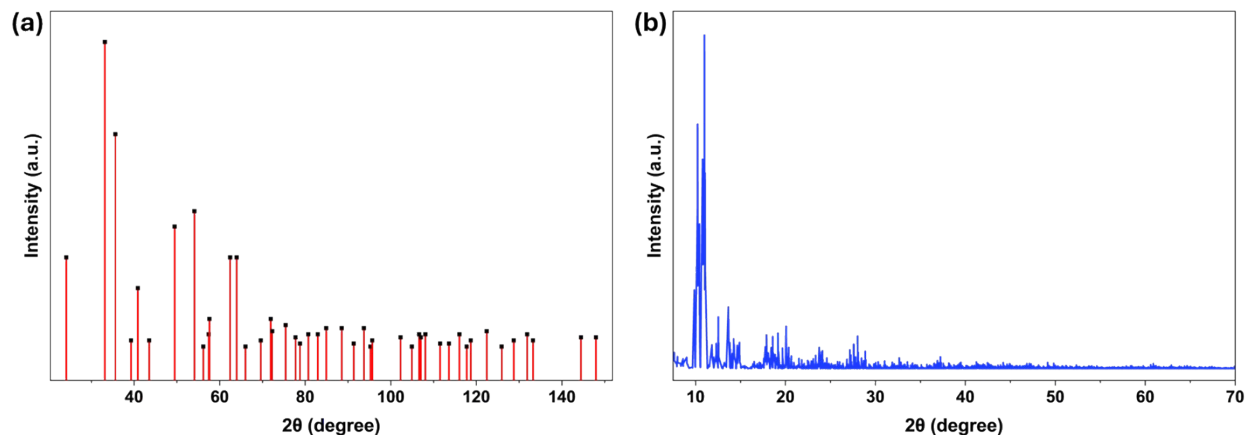

**Fig. S1** (a) Standard XRD pattern of  $\alpha$ -Fe<sub>2</sub>O<sub>3</sub> (Reference code - 00-033-0664, extracted using software X'Pert HighScore Plus), and (b) simulated XRD pattern of MIL-100 (Fe) (CIF file no. - 7102029, extracted from Crystallography Open Database, further analyzed using software VESTA).

| <b>ISO 25178</b>         |      |    |                                |
|--------------------------|------|----|--------------------------------|
| <b>Height Parameters</b> |      |    |                                |
| <b>Sq</b>                | 6.87 | nm | <i>Root mean square height</i> |
| <b>Ssk</b>               | 7.29 |    | <i>Skewness</i>                |
| <b>Sku</b>               | 68.2 |    | <i>Kurtosis</i>                |
| <b>Sp</b>                | 127  | nm | <i>Maximum peak height</i>     |
| <b>Sv</b>                | 23.7 | nm | <i>Maximum pit height</i>      |
| <b>Sz</b>                | 150  | nm | <i>Maximum height</i>          |
| <b>Sa</b>                | 2.27 | nm | <i>Arithmetic mean height</i>  |

**Fig. S2** Height parameters of MARM-II composite determined through atomic force microscopy (AFM) spectroscopy.

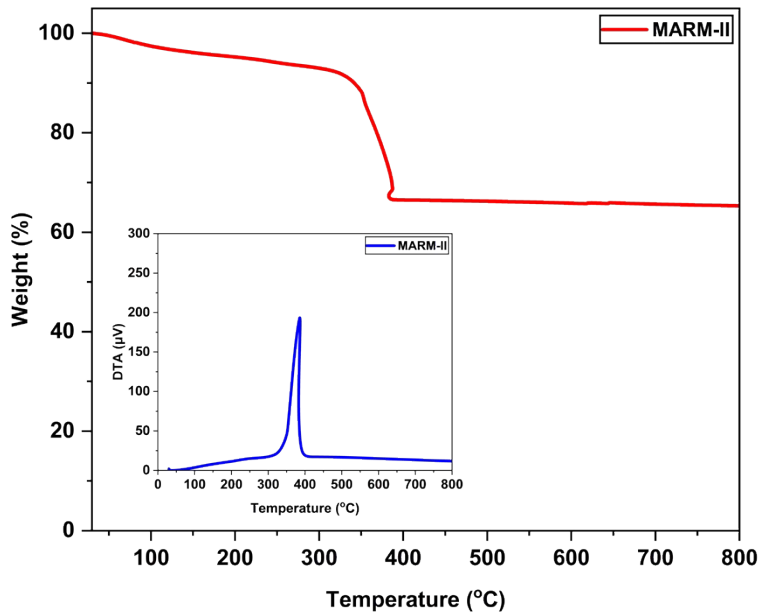

**Fig. S3** Thermogravimetric analysis (TGA) and differential thermal analysis (DTA) (inset) profile of MARM-II composite.

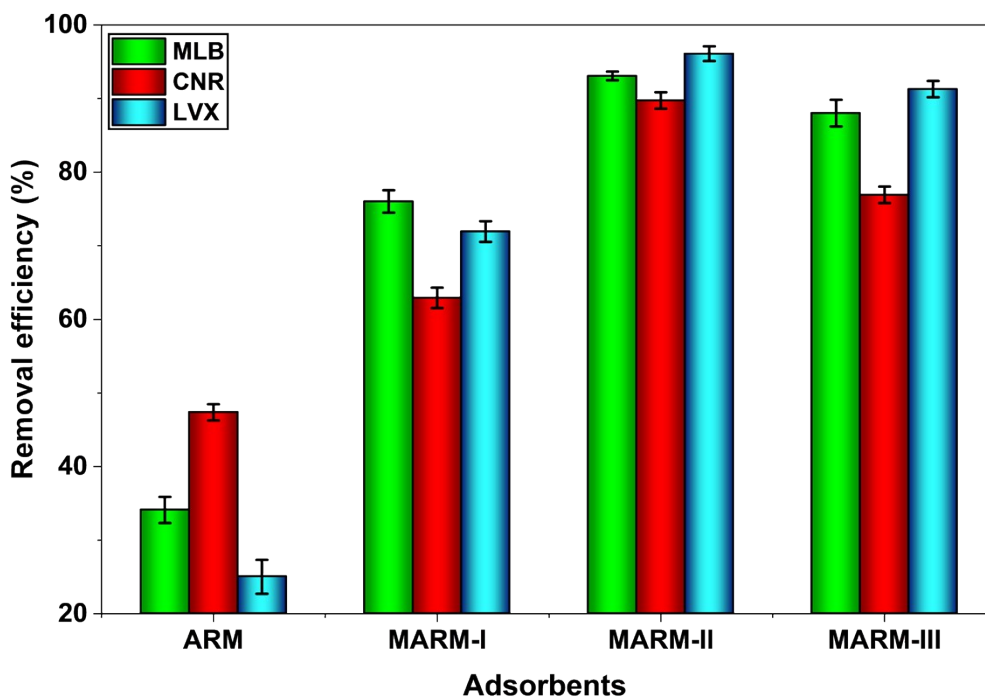

**Fig. S4** Adsorptive removal of methylene blue (MLB), congo red (CNR), and levofloxacin (LVX) using pristine activated red mud (ARM), and ARM/MIL-100 (Fe) (MARM) variants.

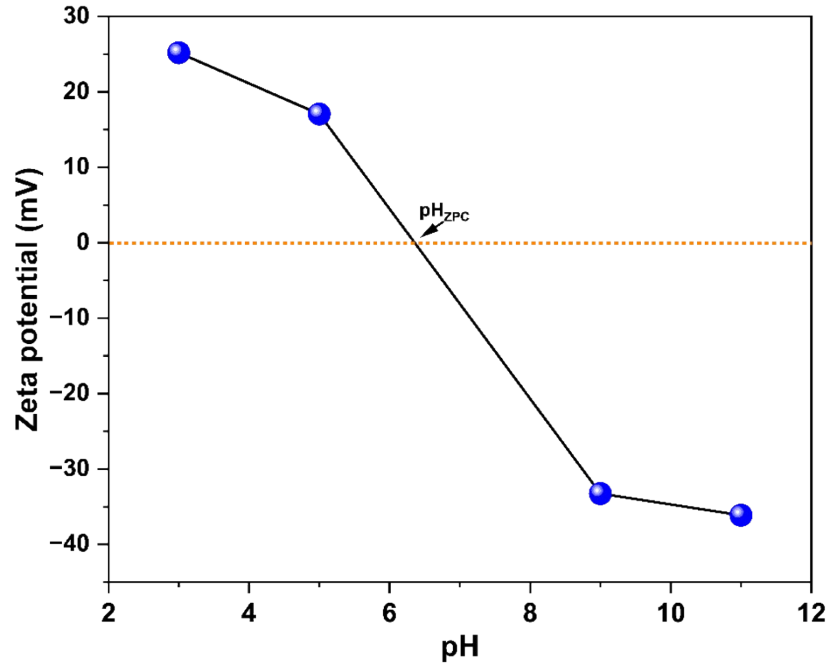

**Fig. S5** Surface charge profile of MARM-II composite obtained through zeta potential analysis.

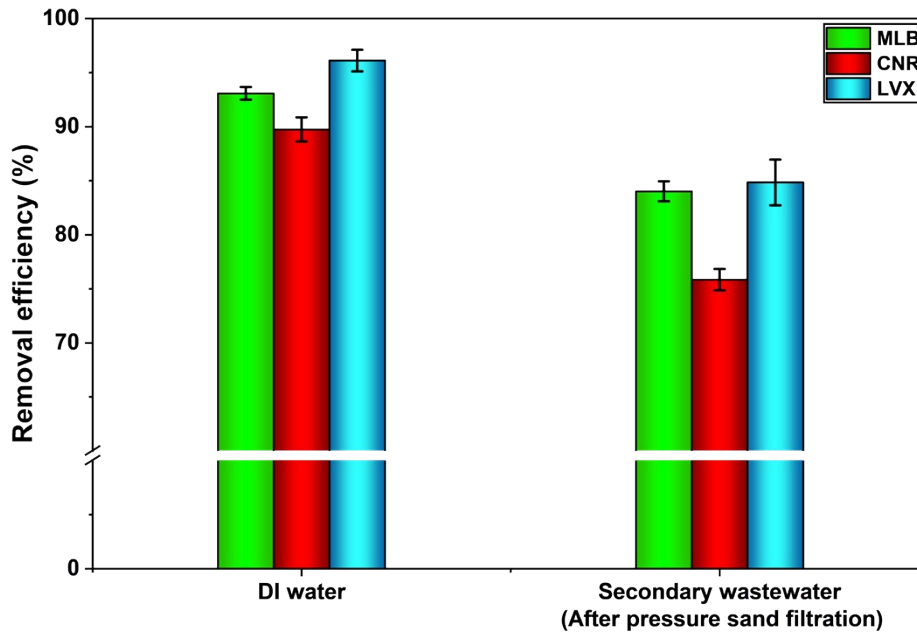

**Fig. S6** Effect real wastewater matrix on the adsorptive removal of MLB, CNR, and LVX.

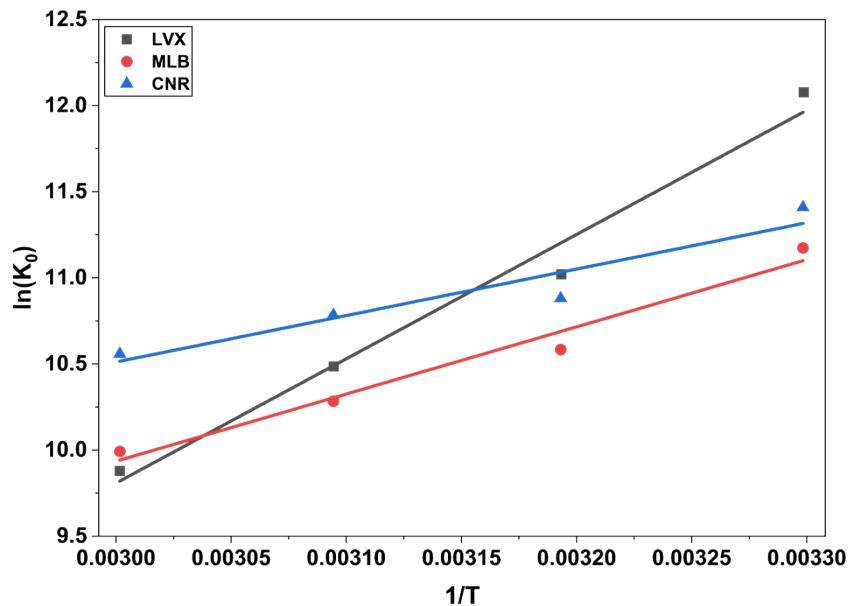

**Fig. S7** Van't Hoff plots for LVX, MLB, and CNR adsorption onto the MARM-II composite.

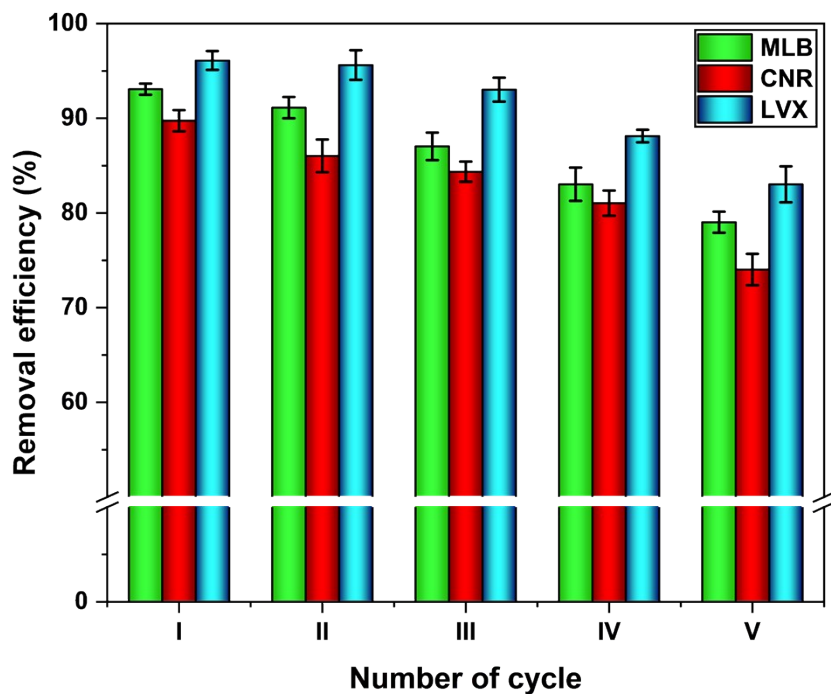

**Fig. S8** Effect of number of cycles on the adsorptive removal of MLB, CNR, and LVX (Contact time: 150 min, initial MLB, CNR, and LVX concentration: 10 mg/L each, MARM-II dose: 0.4 g/L, solution pH: 7, and temperature: 27±3 °C)

**Table S1** Details of chemicals used in the present study.

| S. No. | Name                         | Chemical formula<br>(Price)                                                                  | Purity           | Company           |
|--------|------------------------------|----------------------------------------------------------------------------------------------|------------------|-------------------|
| 1      | Ferrous sulfate heptahydrate | FeSO <sub>4</sub> ·7H <sub>2</sub> O<br>(₹230.00 per 500 g)                                  | ≥98%             | SRL, India        |
| 2      | Trimesic acid                | C <sub>9</sub> H <sub>6</sub> O <sub>6</sub><br>(₹6,220.00 per 100 g)                        | ≥98%             | Merck, India      |
| 3      | Ethanol                      | C <sub>2</sub> H <sub>5</sub> OH<br>(₹620.00 per 1 L)                                        | 99%              | SRL, India        |
| 4      | Hydrochloric acid            | HCl                                                                                          | 37%              | SRL, India        |
| 5      | Sodium hydroxide pellets     | NaOH<br>(₹290.00 per 500 g)                                                                  | 98%              | SRL, India        |
| 6      | Levofloxacin                 | C <sub>18</sub> H <sub>20</sub> FN <sub>3</sub> O <sub>4</sub>                               | HPLC grade, ≥98% | Sigma-<br>Aldrich |
| 7      | Congo Red                    | C <sub>32</sub> H <sub>22</sub> N <sub>6</sub> Na <sub>2</sub> O <sub>6</sub> S <sub>2</sub> | High Purity      | Sigma-<br>Aldrich |
| 8      | Methylene Blue               | C <sub>16</sub> H <sub>18</sub> N <sub>3</sub> SCl                                           | (C.I. 52015)     | Merck, India      |
| 9      | Sodium chloride              | NaCl                                                                                         | ≥99.0%           | Merck, India      |
| 10     | Sodium bicarbonate           | NaHCO <sub>3</sub>                                                                           | ≥99.7%           | Merck, India      |
| 11     | Sodium nitrate               | NaNO <sub>3</sub>                                                                            | ≥99.0%           | Merck, India      |
| 12     | Sodium sulfate               | Na <sub>2</sub> SO <sub>4</sub>                                                              | ≥99.0%           | Merck, India      |
| 13     | Calcium chloride             | CaCl <sub>2</sub>                                                                            | ≥98.0 %          | Merck, India      |
| 14     | Magnesium sulfate            | MgSO <sub>4</sub>                                                                            | ≥98.0 %          | Merck, India      |
| 15     | Alumina refinery residue     | Red mud (RM)<br>(₹600.00 per 2 kg)                                                           |                  |                   |

**Table S2** Instrumentation techniques used in the present study.

| <b>S. No.</b> | <b>Instrument</b>                                              | <b>Company</b>                                                 |
|---------------|----------------------------------------------------------------|----------------------------------------------------------------|
| 1             | X-ray diffraction (XRD) analysis                               | D2 Phaser, Bruker, USA                                         |
| 2             | Micro-Raman spectroscopy                                       | LabRAM HR Evolution, HORIBA Scientific                         |
| 3             | Fourier-transform infrared spectroscopy (FT-IR)                | Bruker Alpha II                                                |
| 4             | Field emission gun scanning electron microscopy (FEG-SEM)      | Zeiss Merlin Gemini II, Germany                                |
| 5             | Atomic force microscopy (AFM)                                  | Agilent 5500 Atomic Force Microscope                           |
| 6             | X-ray photoelectron spectroscopy (XPS)                         | PHI 5000 VersaProbe III, ULVAC PHI Inc., USA                   |
| 7             | High-resolution transmission electron microscopy (HRTEM)       | JEOL (JEM-ARM300F2) (Double Aberration-corrected 300 kV HRTEM) |
| 8             | Inductively coupled plasma mass spectrometry                   | iCAP Q, ICP-MS, Thermo Scientific, USA                         |
| 9             | UV-Vis Spectrophotometer                                       | Cary 60 UV-Vis Spectrophotometer                               |
| 10            | Thermo-gravimetric and Differential Thermal Analysis (TGA-DTA) | Perkin Elmer Pyris Diamond                                     |

**Table S3** Textural properties of MIL-100 (Fe), ARM, and MARM-II composite, as obtained by Brunauer-Emmett-Teller (BET) and Barrett-Joyner-Halenda (BJH) analysis.

| <b>Adsorbent</b> | <b>BET surface area<br/>(m<sup>2</sup>/g)</b> | <b>Cumulative pore<br/>volume (cm<sup>3</sup>/g)</b> | <b>Average pore size<br/>(diameter, nm)</b> |
|------------------|-----------------------------------------------|------------------------------------------------------|---------------------------------------------|
| MIL-100 (Fe)     | 1845.522                                      | 0.108                                                | 3.599                                       |
| ARM              | 21.339                                        | 0.064                                                | 3.829                                       |
| MARM-II          | 651.741                                       | 0.161                                                | 3.626                                       |

**Table S4** Performance comparison of MARM-II composite for the adsorptive removal of LVX, CNR, and MLB, with other reported adsorbents.

| <b>S.<br/>No.</b> | <b>Adsorbent</b>                                        | <b>Targeted<br/>pollutants</b> | <b>Operation<br/>conditions</b>                                                                | <b><math>Q_{max}</math><br/>(mg/g)</b> | <b>Removal<br/>efficiency</b> | <b>Reference</b> |
|-------------------|---------------------------------------------------------|--------------------------------|------------------------------------------------------------------------------------------------|----------------------------------------|-------------------------------|------------------|
| 1                 | (PNHM)/MnO <sub>2</sub> /Fe <sub>3</sub> O <sub>4</sub> | CNR                            | Initial<br>concentration:<br>20 mg/L;<br>Dose: 1 g/L;<br>pH: 6.75;<br>Contact time:<br>180 min | 599.49                                 | 98%                           | <sup>1</sup>     |
| 2                 | GS/PANI/Fe <sub>3</sub> O <sub>4</sub>                  | CNR                            | Initial<br>concentration:                                                                      | 248.76                                 | 92.4%                         | <sup>2</sup>     |

|   |                                                      |     |                                                                                            |       |        |              |
|---|------------------------------------------------------|-----|--------------------------------------------------------------------------------------------|-------|--------|--------------|
|   |                                                      |     | 100 mg/L;<br>Dose: 1 g/L;<br>Contact time:<br>120 min                                      |       |        |              |
| 3 | PANI/Fe <sub>3</sub> O <sub>4</sub>                  | CNR | Initial<br>concentration:<br>20 mg/L;<br>Dose: 2 g/L;<br>Contact time:<br>50 min           | 8.93  | 89.62% | <sup>3</sup> |
| 4 | C/Fe <sub>3</sub> C/γ-Fe <sub>2</sub> O <sub>3</sub> | CNR | Initial<br>concentration:<br>50 mg/L; pH:<br>2; Dose: 0.04<br>g/L; Contact<br>time: 24 min | 531.9 | 96%    | <sup>4</sup> |
| 5 | SW-ZnO-PANI                                          | MLB | Initial<br>concentration:<br>25 mg/L; pH:<br>7; Dose: 0.5<br>g/L; Contact<br>time: 100 min | 20.55 | 95%    | <sup>5</sup> |
| 6 | NBent-NTiO <sub>2</sub> -Chit                        | LVX | Initial<br>concentration:<br>25 mg/L; pH:                                                  | 90.91 | 90.2%  | <sup>6</sup> |

|    |                                                  |     |                                                                             |        |        |    |
|----|--------------------------------------------------|-----|-----------------------------------------------------------------------------|--------|--------|----|
|    |                                                  |     | 4; Dose: 0.5 g/L; Contact time: 10 min                                      |        |        |    |
| 7  | Fe <sub>3</sub> O <sub>4</sub> @SiO <sub>2</sub> | LVX | Initial concentration: 20 mg/L; pH: 6.5; Dose: 1 g/L; Contact time: 240 min | 6.848  | 80.2%  | 7  |
| 8  | Fe-pillared montmorillonite (Fe-P-Mt)            | LVX | Initial concentration: 20mg/L; pH: 7; Dose: 0.5 g/L; Contact time: 48 h     | 48.61  | -      | 8  |
| 9  | PANI/Bi <sub>2</sub> WO <sub>6</sub>             | CNR | Initial concentration: 25 mg/L; pH: 6; Dose: 0.5 g/L; Contact time: 90 min  | 142.92 | 92.03% | 9  |
| 10 | Polyaniline/chitosan                             | CNR | Initial concentration: 100 mg/L; pH: 3; Dose: 0.1                           | 322.58 | 95.4%  | 10 |

|    |                                       |                       |                                                                                                                                        |       |                |               |
|----|---------------------------------------|-----------------------|----------------------------------------------------------------------------------------------------------------------------------------|-------|----------------|---------------|
|    |                                       |                       | g/L; Contact<br>time: 60 min                                                                                                           |       |                |               |
| 11 | MIL-101(Fe)                           | MLB                   | Initial<br>concentration:<br>10 mg/L;<br>Adsorbent dose:<br>2 g/L; Solution<br>pH: 9; Contact<br>time: 10 min                          | 94%   | 58.82 mg/g     | <sup>11</sup> |
| 12 | Magnetic iron<br>oxide/kaolinite (MK) | CNR                   | Initial<br>concentration:<br>50 mg/L;<br>Adsorbent dose:<br>1 g/L; Solution<br>pH: 5.5-5.8<br>(natural pH);<br>Contact time: 30<br>min | ~90%  | 45.59 mg/g     | <sup>12</sup> |
| 13 | UiO-66/MIL-101(Fe)                    | MLB                   | Initial<br>concentration:<br>100 mg/L;<br>Adsorbent dose:<br>0.5 g/L; Solution<br>pH: 9; Contact<br>time: 60 min                       | 99.2% | 448.71<br>mg/g | <sup>13</sup> |
| 14 | RM/TCA-MOF                            | Methyl<br>orange (MO) | Initial<br>concentration:                                                                                                              | 95.2% | 39.52 mg/g     | <sup>14</sup> |

|    |                                                                                            |     |                                                                                                                           |        |                |               |
|----|--------------------------------------------------------------------------------------------|-----|---------------------------------------------------------------------------------------------------------------------------|--------|----------------|---------------|
|    |                                                                                            |     | 6.0 mg/L;<br>Adsorbent dose:<br>0.07 g; Solution<br>pH: 2.33;<br>Contact time: 61<br>min                                  |        |                |               |
| 15 | Coral-like mesoporous<br>carbon aluminosilicate<br>composite from RM<br>waste              | MLB | Initial<br>concentration:<br>40 mg/L;<br>Adsorbent dose:<br>5 mg; Solution<br>pH: Unadjusted;<br>Contact time:<br>120 min | 82.94% | 94.02 mg/g     | <sup>15</sup> |
| 16 | RM derived $\alpha$ -Fe <sub>2</sub> O <sub>3</sub>                                        | CNR | Initial<br>concentration:<br>50 mg/L;<br>Adsorbent dose:<br>0.5 g/L; Solution<br>pH: 5; Contact<br>time: 240 min          | 93%    | 342.57<br>mg/g | <sup>16</sup> |
| 17 | Nanocomposites<br>prepared from RM and<br>durian husk (bp-Fe <sub>3</sub> O <sub>4</sub> ) | MLB | Initial<br>concentration:<br>50 mg/L;<br>Adsorbent dose:<br>3 g/L; Solution<br>pH: 7; Contact<br>time: 60 min             | >90%   | 37.5 mg/g      | <sup>17</sup> |

|           |                |            |                                                                                                        |                |              |                   |
|-----------|----------------|------------|--------------------------------------------------------------------------------------------------------|----------------|--------------|-------------------|
| <b>18</b> | <b>MARM-II</b> | <b>MLB</b> | <b>Initial concentration:<br/>10 mg/L;<br/>Dose: 0.4 g/L;<br/>pH: 7;<br/>Contact time:<br/>60 min</b>  | <b>123.021</b> | <b>~ 93%</b> | <b>This study</b> |
|           |                | <b>CNR</b> | <b>Initial concentration:<br/>10 mg/L;<br/>Dose: 0.4 g/L;<br/>pH: 7;<br/>Contact time:<br/>105 min</b> | <b>143.934</b> | <b>~ 90%</b> |                   |
|           |                | <b>LVX</b> | <b>Initial concentration:<br/>10 mg/L;<br/>Dose: 0.4 g/L;<br/>pH: 7;<br/>Contact time:<br/>60 min</b>  | <b>97.657</b>  | <b>~ 96%</b> |                   |

**Table S5** Water quality parameters of secondary wastewater matrix.

| Parameters                                                                        | Secondary wastewater<br>(After pressure sand filter) |
|-----------------------------------------------------------------------------------|------------------------------------------------------|
| pH                                                                                | 6.4 ± 0.2                                            |
| Turbidity (NTU)                                                                   | 8.1 ± 0.4                                            |
| TSS (mg/L)                                                                        | 56 ± 3                                               |
| TDS (mg/L)                                                                        | 328 ± 3                                              |
| Electrical conductivity (µS/cm)                                                   | 511 ± 6                                              |
| Chloride ( $Cl^-$ , mg/L)                                                         | 56.3 ± 3.8                                           |
| Bicarbonate ( $HCO_3^-$ , mg/L)                                                   | 119.4 ± 6.5                                          |
| Sulfate ( $SO_4^{2-}$ , mg/L)                                                     | 24.2 ± 1.6                                           |
| Nitrate ( $NO_3^-$ , mg/L)                                                        | 68.2 ± 0.7                                           |
| Phosphate ( $PO_4^{3-}$ , mg/L)                                                   | 13.3 ± 1.8                                           |
| COD (mg/L) (Without addition of MLB+CNR+LVX)                                      | 77.2 ± 4.50                                          |
| TOC (mg/L) (Without addition of MLB+CNR+LVX)                                      | 26.41 ± 3.17                                         |
| COD (mg/L) (With addition of MLB+CNR+LVX, each having a concentration of 10 mg/L) | 181.0 ± 3.26                                         |
| TOC (mg/L) (With addition of MLB+CNR+LVX, each having a concentration of 10 mg/L) | 58.53 ± 2.05                                         |

**Table S6** Various kinetic model constants for MLB, CNR, and LVX adsorption on MARM-II composite.

| Kinetic models                             |                                  | Parameters                       | MLB                 | CNR          | LVX                  |
|--------------------------------------------|----------------------------------|----------------------------------|---------------------|--------------|----------------------|
| Pseudo-first-order<br>(PFO) kinetic model  |                                  | $q_e$ (mg/g)                     | 27.277±0.076        | 25.976±0.215 | 31.586±0.082         |
|                                            |                                  | $k_1$ (min <sup>-1</sup> )       | 0.119               | 0.091        | 0.142                |
|                                            |                                  | R <sup>2</sup>                   | 0.999               | 0.995        | 0.999                |
| Pseudo-second-order<br>(PSO) kinetic model |                                  | $q_e$ (mg/g)                     | 28.299              | 27.653±0.09  | 32.459±0.127         |
|                                            |                                  | $k_2$ (g/mg.min)                 | 0.011               | 0.006        | 0.014                |
|                                            |                                  | R <sup>2</sup>                   | 0.998               | 0.999        | 0.999                |
| Elovich model                              |                                  | $\alpha$ (mg/g.min)              | $3.262 \times 10^5$ | 497.883      | $9.3654 \times 10^7$ |
|                                            |                                  | $\beta$ (g/mg)                   | 0.614               | 0.378        | 0.714                |
|                                            |                                  | R <sup>2</sup>                   | 0.992               | 0.995        | 0.999                |
| Intraparticle<br>diffusion<br>(IPD) model  | Stage 1                          | c                                | 0.847±3.541         | 0.614±2.567  | 1.175±4.915          |
|                                            |                                  | $k_i$ (mg/g.min <sup>0.5</sup> ) | 4.950±0.914         | 4.462±0.663  | 5.886±1.269          |
|                                            |                                  | R <sup>2</sup>                   | 0.967               | 0.978        | 0.955                |
|                                            | Stage 2                          | c                                | 22.725±1.873        | 19.027±0.405 | 28.082±0.365         |
|                                            |                                  | $k_i$ (mg/g.min <sup>0.5</sup> ) | 0.613±0.279         | 0.823±0.06   | 0.462±0.054          |
|                                            |                                  | R <sup>2</sup>                   | 0.828               | 0.995        | 0.986                |
| Stage 3                                    | c                                | 27.225±0.033                     | 23.729±0.433        | 31.373±0.106 |                      |
|                                            | $k_i$ (mg/g.min <sup>0.5</sup> ) | 0.009±0.003                      | 0.238±0.042         | 0.031±0.01   |                      |
|                                            | R <sup>2</sup>                   | 0.615                            | 0.864               | 0.641        |                      |

**Table S7** Isotherm models for LVX, MLB, and CNR adsorption on MARM-II composite.

| S. No. | Model                             | Parameters       | Contaminants  |                |                |
|--------|-----------------------------------|------------------|---------------|----------------|----------------|
|        |                                   |                  | LVX           | MLB            | CNR            |
| 1      | Langmuir isotherm<br><br>303.15 K | $Q_{max}$ (mg/g) | 89.895±7.318  | 123.021±11.926 | 143.934±24.248 |
|        |                                   | $K_L$ (L/mg)     | 0.486±0.125   | 0.222±0.053    | 0.129±0.045    |
|        |                                   | $\chi^2$         | 27.726        | 23.754         | 38.622         |
|        |                                   | $R^2$            | 0.979         | 0.986          | 0.977          |
|        | 313.15 K                          | $Q_{max}$ (mg/g) | 97.657±5.686  | 120.488±11.390 | 131.708±27.694 |
|        |                                   | $K_L$ (L/mg)     | 0.169±0.025   | 0.123±0.026    | 0.076±0.031    |
|        |                                   | $\chi^2$         | 10.173        | 11.989         | 34.084         |
|        |                                   | $R^2$            | 0.992         | 0.991          | 0.963          |
|        | 323.15 K                          | $Q_{max}$ (mg/g) | 91.042±11.673 | 98.423±9.481   | 98.613±16.654  |
|        |                                   | $K_L$ (L/mg)     | 0.099±0.028   | 0.091±0.013    | 0.069±0.024    |
|        |                                   | $\chi^2$         | 17.111        | 8.413          | 18.617         |
|        |                                   | $R^2$            | 0.973         | 0.991          | 0.977          |
|        | 333.15 K                          | $Q_{max}$ (mg/g) | 84.736±17.607 | 69.812±10.154  | 70.543±13.082  |
|        |                                   | $K_L$ (L/mg)     | 0.054±0.022   | 0.068±0.021    | 0.055±0.021    |
|        |                                   | $\chi^2$         | 16.787        | 9.965          | 11.425         |
|        |                                   | $R^2$            | 0.969         | 0.978          | 0.973          |
| 2      | Freundlich isotherm               | $K_F$            | 25.868±4.951  | 21.894±4.421   | 16.998±4.339   |

|   |                               |                                              |               |                |                |
|---|-------------------------------|----------------------------------------------|---------------|----------------|----------------|
|   | 303.15 K                      | $(\text{mg/g}).(\text{L/mg})^{1/n}$          |               |                |                |
|   |                               | n                                            | 2.454±0.455   | 1.784±0.275    | 1.539±0.255    |
|   |                               | $\chi^2$                                     | 80.112        | 67.619         | 76.934         |
|   |                               | $R^2$                                        | 0.939         | 0.96           | 0.955          |
|   | 313.15 K                      | $K_F$<br>$(\text{mg/g}).(\text{L/mg})^{1/n}$ | 16.013±3.345  | 14.771±3.059   | 10.749±3.421   |
|   |                               | n                                            | 1.907±0.286   | 1.649±0.219    | 1.479±0.26     |
|   |                               | $\chi^2$                                     | 43.053        | 38.608         | 62.264         |
|   |                               | $R^2$                                        | 0.962         | 0.971          | 0.95           |
|   | 323.15 K                      | $K_F$<br>$(\text{mg/g}).(\text{L/mg})^{1/n}$ | 10.302±3.175  | 10.331±2.463   | 8.175±2.725    |
|   |                               | n                                            | 1.728±0.323   | 1.668±0.235    | 1.57±0.283     |
|   |                               | $\chi^2$                                     | 49.133        | 29.083         | 42.457         |
|   |                               | $R^2$                                        | 0.941         | 0.968          | 0.947          |
|   | 333.15 K                      | $K_F$<br>$(\text{mg/g}).(\text{L/mg})^{1/n}$ | 5.823±2.260   | 6.178±2.185    | 5.166±1.936    |
|   |                               | n                                            | 1.535±0.3     | 1.672±0.322    | 1.589±0.304    |
|   |                               | $\chi^2$                                     | 33.69         | 27.807         | 24.165         |
|   |                               | $R^2$                                        | 0.939         | 0.939          | 0.942          |
| 3 | Sips isotherm<br><br>303.15 K | $Q_m$ (mg/g)                                 | 92.506±16.885 | 108.519±18.625 | 100.662±11.126 |
|   |                               | $K_s$ (L/mg) <sup>m</sup>                    | 0.463±0.183   | 0.250±0.067    | 0.149±0.035    |
|   |                               | m                                            | 0.941±0.291   | 1.185±0.313    | 1.584±0.378    |
|   |                               | $\chi^2$                                     | 40.6829       | 29.540         | 23.412         |
|   |                               | $R^2$                                        | 0.979         | 0.988          | 0.991          |

|   |          |                                                    |                 |               |               |               |
|---|----------|----------------------------------------------------|-----------------|---------------|---------------|---------------|
| 4 | 313.15 K | $Q_m$ (mg/g)                                       | 87.745±7.654    | 100±17.763    | 95±39.954     |               |
|   |          | $K_s$ (L/mg) <sup>m</sup>                          | 0.172±0.023     | 0.132±0.028   | 0.1±0.038     |               |
|   |          | m                                                  | 1.182±0.174     | 1.197±0.275   | 1.2±0.618     |               |
|   |          | $\chi^2$                                           | 6.079           | 15.745        | 44.003        |               |
|   |          | $R^2$                                              | 0.996           | 0.992         | 0.976         |               |
|   | 323.15 K | $Q_m$ (mg/g)                                       | 77.913±15.574   | 83.369±13.407 | 75.517±39.174 |               |
|   |          | $K_s$ (L/mg) <sup>m</sup>                          | 0.0954±0.027    | 0.0899±0.02   | 0.066±0.037   |               |
|   |          | m                                                  | 1.2±0.349       | 1.203±0.253   | 1.2±0.714     |               |
|   |          | $\chi^2$                                           | 13.096          | 9.137         | 37.235        |               |
|   |          | $R^2$                                              | 0.979           | 0.986         | 0.938         |               |
|   | 333.15 K | $Q_m$ (mg/g)                                       | 68.706±27.047   | 56.152±8.083  | 58.181±19.308 |               |
|   |          | $K_s$ (L/mg) <sup>m</sup>                          | 0.051±0.024     | 0.057±0.019   | 0.051±0.025   |               |
|   |          | m                                                  | 1.2±0.525       | 1.3±0.288     | 1.2±0.465     |               |
|   |          | $\chi^2$                                           | 15.756          | 4.990         | 11.487        |               |
|   |          | $R^2$                                              | 0.981           | 0.993         | 0.963         |               |
| 4 | 303.15 K | Redlich-Peterson isotherm                          | $K_{RP}$ (L/mg) | 51.259±28.282 | 23.809±9.633  | 18.543±14.608 |
|   |          | $\alpha_{RP}$ (L/mg) <sup><math>\beta</math></sup> | 0.729±0.861     | 0.1±0.269     | 0.129±0.611   |               |
|   |          | $\beta$                                            | 0.918±0.218     | 1.234±0.833   | 1±1.4         |               |
|   |          | $\chi^2$                                           | 38.743          | 32.999        | 57.934        |               |
|   |          | $R^2$                                              | 0.98            | 0.987         | 0.977         |               |
|   | 313.15 K | $K_{RP}$ (L/mg)                                    | 13.826±3.089    | 13.18±4.438   | 10.024±9.59   |               |
|   |          | $\alpha_{RP}$ (L/mg) <sup><math>\beta</math></sup> | 0.059±0.094     | 0.0545±0.148  | 0.076±0.532   |               |
|   |          | $\beta$                                            | 1.273±0.433     | 1.225±0.779   | 1±1.836       |               |

|  |          |                                   |             |             |             |
|--|----------|-----------------------------------|-------------|-------------|-------------|
|  |          | $\chi^2$                          | 7.286       | 16.663      | 51.127      |
|  |          | $R^2$                             | 0.996       | 0.992       | 0.973       |
|  | 323.15 K | $K_{RP}$ (L/mg)                   | 9.014±6.338 | 7.612±2.261 | 6.866±5.486 |
|  |          | $\alpha_{RP}$ (L/mg) <sup>β</sup> | 0.099±0.365 | 0.023±0.073 | 0.07±0.363  |
|  |          | $\beta$                           | 1±0.855     | 1.353±0.855 | 1±1.241     |
|  |          | $\chi^2$                          | 25.668      | 10.709      | 27.926      |
|  |          | $R^2$                             | 0.979       | 0.992       | 0.977       |
|  | 333.15 K | $K_{RP}$ (L/mg)                   | 4.566±4.264 | 4.728±3.218 | 3.866±3.031 |
|  |          | $\alpha_{RP}$ (L/mg) <sup>β</sup> | 0.054±0.355 | 0.068±0.264 | 0.055±0.279 |
|  |          | $\beta$                           | 1±1.515     | 1±0.857     | 1±1.132     |
|  |          | $\chi^2$                          | 25.198      | 14.948      | 17.138      |
|  |          | $R^2$                             | 0.94        | 0.978       | 0.973       |

**Table S8** Thermodynamic parameters for LVX, MLB, and CNR adsorption on MARM-II composite.

| Pollutant | Temperature (K) | $K_e^\circ$ | $\Delta G^\circ$ (kJ/mol) | $\Delta H^\circ$ (kJ/mol) | $\Delta S^\circ$ (kJ/K.mol) | $R^2$ |
|-----------|-----------------|-------------|---------------------------|---------------------------|-----------------------------|-------|
| MLB       | 303.15          | 71017.8     | -28.154                   | -32.474±3.71              | -0.015±0.012                | 0.974 |
|           | 313.15          | 39347.7     | -27.546                   |                           |                             |       |
|           | 323.15          | 29110.9     | -27.616                   |                           |                             |       |
|           | 333.15          | 21753.2     | -27.664                   |                           |                             |       |
| CNR       | 303.15          | 89874.3     | -28.748                   | -22.434±4.881             | 0.002±0.015                 | 0.913 |

|     |        |          |         |               |              |       |
|-----|--------|----------|---------|---------------|--------------|-------|
|     | 313.15 | 52949.2  | -28.319 |               |              |       |
|     | 323.15 | 48072.3  | -28.964 |               |              |       |
|     | 333.15 | 38318.5  | -29.232 |               |              |       |
| LVX | 303.15 | 175640.4 | -30.437 | -60.043±5.924 | -0.098±0.002 | 0.981 |
|     | 313.15 | 61076.6  | -28.691 |               |              |       |
|     | 323.15 | 35778.6  | -28.170 |               |              |       |
|     | 333.15 | 19515.6  | -27.363 |               |              |       |

**Table S9** Cost analyses of synthesis of MARM-II composite and MLB+CNR+LVX solution treatment

| <b><u>Cost assessment of MARM-II for research purpose</u></b>                                                                                                                                                                                                                                                                                                                                    |
|--------------------------------------------------------------------------------------------------------------------------------------------------------------------------------------------------------------------------------------------------------------------------------------------------------------------------------------------------------------------------------------------------|
| <p><b><u>Chemical cost</u></b></p> <p><b>i) For synthesis of MARM-II</b><br/>           = 2.25 g of FeSO<sub>4</sub>.7H<sub>2</sub>O + 1.42 g of H<sub>3</sub>BTC + 0.80 g of NaOH (pellets) + 2.84 g of ARM<br/>           = ₹ (1.035 + 88.324 + 0.464 + 0.852)<br/>           = ₹ 90.675</p> <p><b>ii) For washing of MARM-II</b><br/>           = 10 mL of ethanol<br/>           = ₹ 6.2</p> |

**Energy cost (Instruments not utilized to full capacity)**

**i) Producing 5 g ARM using muffle furnace (1500 W) for 4 h**

$$= (1500/1000) \times 4 \times 7.12^* = ₹ 42.72$$

**ii) Stirring (100 W) for 20 h (Using single point of multi-point magnetic stirrer)**

$$= (100/1000) \times 20 \times 7.12 = ₹ 14.24$$

**iii) Drying (60 °C) using hot air oven (800 W) for total of 8 h**

$$= (800/1000) \times 8 \times 7.12 = ₹ 45.568$$

**iv) Heating (150 °C) using hot air oven (800 W) for total of 6 h**

$$= (800/1000) \times 6 \times 7.12 = ₹ 34.176$$

*\*Average tariff for electricity as per West Bengal State Electricity Distribution Company Limited (WBSEDCL) = 712 Paise/kWh.<sup>18</sup>*

**Average experimental yield of MARM-II = 4.63 g**

Chemical cost = ₹ 96.875

Energy cost = ₹ 136.70

**Total cost incurred for per unit wt. synthesis of MARM-II = ₹ 50.45/g (0.56 US \$/g)**

**Scaling possibility (Using multi-point magnetic stirrer)**

**Chemical cost**

**i) For synthesis of MARM-II (10 points)**

$$= [2.25 \text{ g of FeSO}_4 \cdot 7\text{H}_2\text{O} + 1.42 \text{ g of H}_3\text{BTC} + 0.80 \text{ g of NaOH (pellets)} + 2.84 \text{ g of ARM}] \times 10$$

$$= [₹ (1.035 + 88.324 + 0.464 + 0.852)] \times 10$$

$$= ₹ 906.75$$

**ii) For washing of MARM-II**

$$= [10 \text{ mL of ethanol}] \times 10$$

$$= ₹ 62$$

**Energy cost (Instruments utilization capacity enhanced)**

**i) Producing 30 g ARM using muffle furnace (1500 W) for 4 h**

$$= (1500/1000) \times 4 \times 7.12 = ₹ 42.72$$

**ii) Stirring (100 W) for 20 h (10 points of multi-point magnetic stirrer)**

$$= (100/1000) \times 20 \times 7.12 = ₹ 14.24$$

**iii) Drying (60 °C) using hot air oven (800 W) for total of 8 h**

$$= (800/1000) \times 8 \times 7.12 = ₹ 45.568$$

**iv) Heating (150 °C) using hot air oven (800 W) for total of 6 h**

$$= (800/1000) \times 6 \times 7.12 = ₹ 34.176$$

**Average experimental yield of MARM-II = 46.3 g**

Chemical cost = ₹ 968.75

Energy cost = ₹ 136.70

**Total cost incurred for per unit wt. synthesis of MARM-II = ₹ 23.87/g (0.27 US \$/g)**

Therefore, total cost incurred (after scale-up) for treatment of 1 L (100 mL × 10) of MLB+CNR+LVX solution (each having a concentration of 10 mg/L);

= Adsorbent cost + stirring cost

$$= [(0.4 \text{ g/L}) \times 1\text{L} \times 23.87] + [(100/1000) \times (150/60) \times 7.12]$$

$$= ₹ 11.328/\text{L} (0.13 \text{ US } \$/\text{L})$$

## References

- 1 S. Dutta, S. K. Srivastava, B. Gupta and A. K. Gupta, *ACS Appl. Mater. Interfaces*, 2021, **13**, 54324–54338.
- 2 B. Mu, J. Tang, L. Zhang and A. Wang, *Sci. Rep.*, 2017, **7**, 5347.
- 3 X. P. Teng, M. Y. K. Bryan, P. V. Chai and J. Y. Law, *Mater. Today Proc.*, 2021, **46**, 1875–1881.
- 4 S. R. Manippady, A. Singh, B. M. Basavaraja, A. K. Samal, S. Srivastava and M. Saxena, *ACS Appl. Nano Mater.*, 2020, **3**, 1571–1582.
- 5 R. Pandimurugan and S. Thambidurai, *J. Environ. Chem. Eng.*, 2016, **4**, 1332–1347.
- 6 M. E. Mahmoud, A. M. El-Ghanam, R. H. A. Mohamed and S. R. Saad, *Mater. Sci. Eng. C*, 2020, **108**, 110199.
- 7 M. H. Al-Jabari, S. Sulaiman, S. Ali, R. Barakat, A. Mubarak and S. A. Khan, *J. Mol. Liq.*, 2019, **291**, 111249.

- 8 Y. Liu, C. Dong, H. Wei, W. Yuan and K. Li, *Appl. Clay Sci.*, 2015, **118**, 301–307.
- 9 M. Laabd, H. Ait Ahsaine, A. El Jaouhari, B. Bakiz, M. Bazzaoui, M. Ezahri, A. Albourine and A. Benlhachemi, *J. Environ. Chem. Eng.*, 2016, **4**, 3096–3105.
- 10 V. Janaki, B.-T. Oh, K. Shanthi, K.-J. Lee, A. K. Ramasamy and S. Kamala-Kannan, *Synth. Met.*, 2012, **162**, 974–980.
- 11 A. S. Eltaweil, E. M. Abd El-Monaem, A. M. Omer, R. E. Khalifa, M. M. Abd El-Latif and G. M. El-Subruiti, *Desalin. Water Treat.*, 2020, **189**, 395–407.
- 12 N. Mahmud and A. Benamor, *Water Conserv. Sci. Eng.*, 2023, **8**, 35.
- 13 A. S. Eltaweil, E. M. Abd El-Monaem, G. M. El-Subruiti, M. M. Abd El-Latif and A. M. Omer, *RSC Adv.*, 2020, **10**, 19008–19019.
- 14 M. Chegeni, M. Chegeni and G. E. Zade, *Sci. Rep.*, 2025, **15**, 32145.
- 15 M. F. J. D. P. Tanasale, D. Prasetyoko, E. P. Ramdhani, S. Jovita, R. Subagyo, D. W. Indriani, E. Santoso, Y. Kusumawati, Z. Rahmawati, N. A. Mijan, R. E. Nugraha and H. Holilah, *J. Umm Al-Qura Univ. Appl. Sci.*, DOI:10.1007/s43994-025-00264-z.
- 16 J. Wang, P. Sun, H. Xue, J. Chen, H. Zhang and W. Zhu, *J. Phys. Chem. Solids*, 2020, **140**, 109379.
- 17 N. T. Bui, T. T. Hoang, P. L. N. Nguyen, N. T. M. Linh, Q.-A. Trieu and T. H. Bui, *AQUA — Water Infrastructure, Ecosyst. Soc.*, 2023, **72**, 827–840.
- 18 WBSEDCL, *Tariff rate for the year 2024-25*, 2025.
